# Supplementary material for: Exploration of Vulcanodinium rugosum Toxins and their Metabolism Products in Mussels from the Ingril Lagoon Hotspot in France
Source: MDPI journal article supplement (doi:10.3390/md21080429), 2023-07-29
Supplement: s1 [file s1]

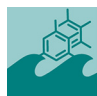

## Supplementary Materials

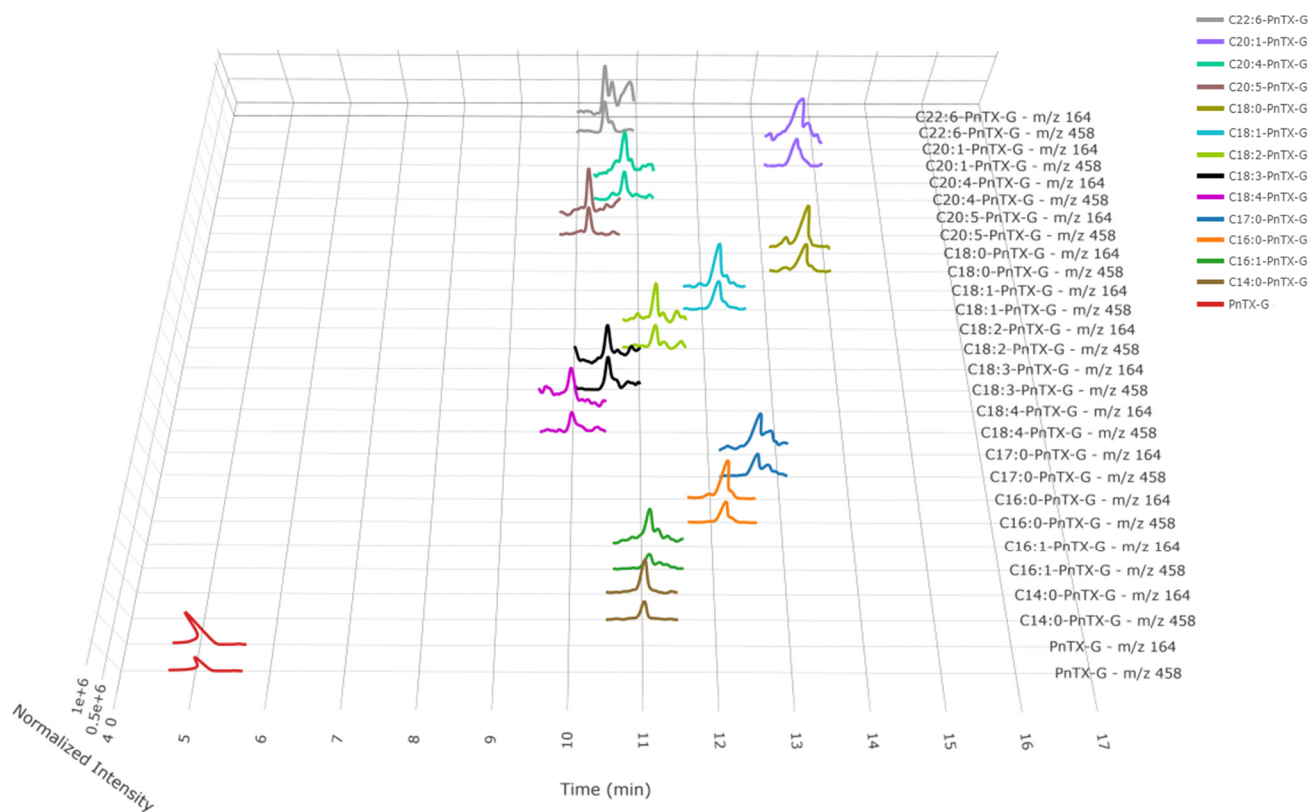

**Figure S1.** Detection of PnTX-G and 13 of its fatty acid esters by LC-MS/MS in the mussel sample collected in June (18 BM 122). Chromatogram created with R version 4.0.3, and with the Plotly package version 4.10.0 [49,51].

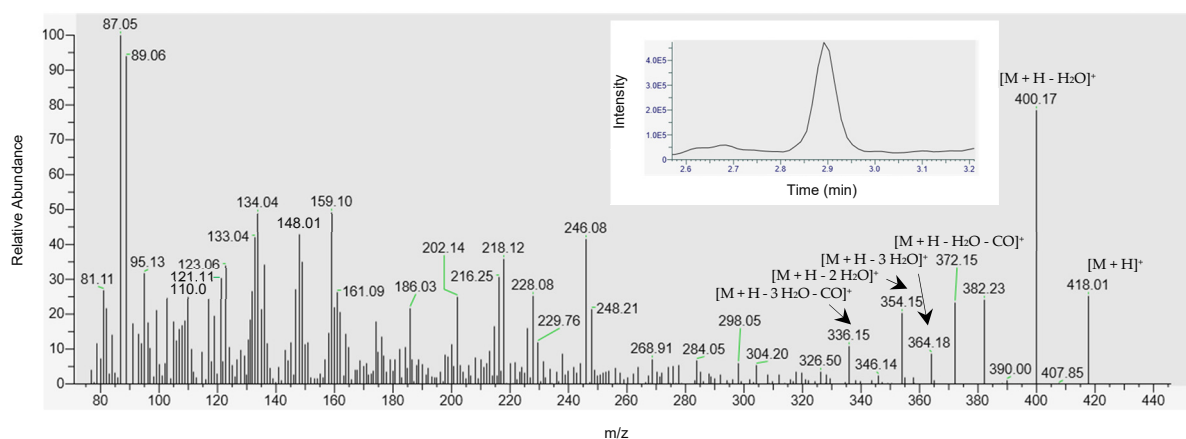

**Figure S2.** Product ion scan obtained from the precursor ion at m/z 418.2 (same as the protonated portimine-B  $[M + H]^+$ ) for the compound eluted at 2.9 min in sample 18 BM 150.

**Table S1.** Molecular formula and monoisotopic mass of the protonated PnTX-G esters  $[M + H]^+$  reported by McCarron et al. [17].

| Fatty acid chain | Systematic name (Trivial name) | Ester molecular formula                          | Monoisotopic mass of the protonated molecule $[M + H]^+$ |
|------------------|--------------------------------|--------------------------------------------------|----------------------------------------------------------|
| C14:0            | Tetradecanoic (Myristic)       | C <sub>56</sub> H <sub>89</sub> NO <sub>8</sub>  | 904.66664                                                |
| C15:0            | Pentadecanoic (Pentadecylic)   | C <sub>57</sub> H <sub>91</sub> NO <sub>8</sub>  | 918.68229                                                |
| C16:2            | Hexadecadienoic                | C <sub>58</sub> H <sub>89</sub> NO <sub>8</sub>  | 928.66664                                                |
| C16:1            | Hexadecaenoic                  | C <sub>58</sub> H <sub>91</sub> NO <sub>8</sub>  | 930.68229                                                |
| C16:0            | Hexadecanoic (Palmitic)        | C <sub>58</sub> H <sub>93</sub> NO <sub>8</sub>  | 932.69794                                                |
| C17:2            | Heptadecadienoic               | C <sub>59</sub> H <sub>91</sub> NO <sub>8</sub>  | 942.68229                                                |
| C17:1            | Heptadecaenoic                 | C <sub>59</sub> H <sub>93</sub> NO <sub>8</sub>  | 944.69794                                                |
| C17:0            | Heptadecanoic (Margaric)       | C <sub>59</sub> H <sub>95</sub> NO <sub>8</sub>  | 946.71359                                                |
| C18:4            | Octadecatetraenoic             | C <sub>60</sub> H <sub>89</sub> NO <sub>8</sub>  | 952.66664                                                |
| C18:3            | Octadecatrienoic               | C <sub>60</sub> H <sub>91</sub> NO <sub>8</sub>  | 954.68229                                                |
| C18:2            | Octadecadienoic                | C <sub>60</sub> H <sub>93</sub> NO <sub>8</sub>  | 956.69794                                                |
| C18:1            | Octadecaenoic                  | C <sub>60</sub> H <sub>95</sub> NO <sub>8</sub>  | 958.71359                                                |
| C18:0            | Octadecanoic (Stearic)         | C <sub>60</sub> H <sub>97</sub> NO <sub>8</sub>  | 960.72924                                                |
| C19:0            | Nonadecanoic (Nonadecylic)     | C <sub>61</sub> H <sub>99</sub> NO <sub>8</sub>  | 974.74489                                                |
| C20:5            | Eicosapentaenoic               | C <sub>62</sub> H <sub>91</sub> NO <sub>8</sub>  | 978.68229                                                |
| C20:4            | Eicosatetraenoic               | C <sub>62</sub> H <sub>93</sub> NO <sub>8</sub>  | 980.69794                                                |
| C20:3            | Eicosatrienoic                 | C <sub>62</sub> H <sub>95</sub> NO <sub>8</sub>  | 982.71359                                                |
| C20:2            | Eicosadienoic                  | C <sub>62</sub> H <sub>97</sub> NO <sub>8</sub>  | 984.72924                                                |
| C20:1            | Eicosenoic                     | C <sub>62</sub> H <sub>99</sub> NO <sub>8</sub>  | 986.74489                                                |
| C22:6            | Docosahexaenoic                | C <sub>64</sub> H <sub>93</sub> NO <sub>8</sub>  | 1004.69794                                               |
| C22:5            | Docosapentaenoic               | C <sub>64</sub> H <sub>95</sub> NO <sub>8</sub>  | 1006.71359                                               |
| C22:4            | Docosatetraenoic               | C <sub>64</sub> H <sub>97</sub> NO <sub>8</sub>  | 1008.72924                                               |
| C22:3            | Docosatrienoic                 | C <sub>64</sub> H <sub>99</sub> NO <sub>8</sub>  | 1010.74489                                               |
| C22:2            | Docosadienoic                  | C <sub>64</sub> H <sub>101</sub> NO <sub>8</sub> | 1012.76054                                               |
| C24:6            | Tetracosahexaenoic             | C <sub>66</sub> H <sub>97</sub> NO <sub>8</sub>  | 1032.72924                                               |
| C24:5            | Tetracosapentaenoic            | C <sub>66</sub> H <sub>99</sub> NO <sub>8</sub>  | 1034.74489                                               |
